# Supplementary material
Source: MDPI journal article supplement (https://www.mdpi.com/2313-0105/9/9/477)
Supplement: s1 [file s1]

## Supplementary Information

### *Selection of suitable salt ratio.*

As pre-experiment, we tried different salt ratios including LiTFSI : LiDFOB = 0.25 M : 0.75 M (named as T1D3); 0.5 M : 0.5 M (named as T1D1); and 0.75 M : 0.25 M (named as T3D1). Their cycling performance under 2.7–4.4 V is shown in **Figure S1**.

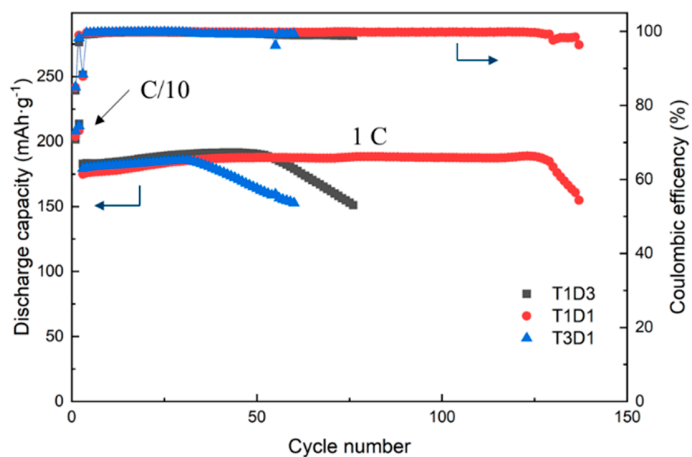

**Figure S1.** Cycling performance of three electrolytes with different LiTFSI to LiDFOB ratios under 2.7–4.4 V.

It can be seen from **Figure S1** that T3D1 shows the worst performance. T1D1 shows better performance than T1D3, however after around 130 cycles, it also suffers from rapid capacity loss. After adding 5.5 wt% of FEC into both T1D1 and T1D3 we get T1D1-5.5 and T1D3-5.5. A comparison of their cycling performance is shown in **Figure S2**.

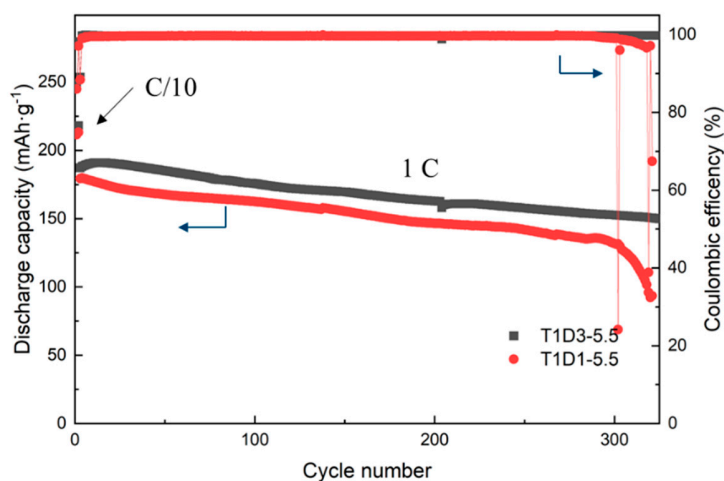

**Figure S2.** Cycling performance of T1D3-5.5 and T1D1-5.5 under 2.7–4.4 V.

After adding FEC, the performance of both electrolytes is improved. However, the improvement of T1D3-5.5 is more significant which even outperforms the T1D1-5.5. Thus, we chose T1D3 and T1D3-5.5 to study the synergy of dual-salt and FEC additive.

*Detailed EIS fitting result.*

**Table S1.** All the EIS fitting data of Li||NMC811 cells in three electrolytes after 2 cycles and 100 cycles.

| Notation                               | After 2 cycles       |                      |                      | After 100 cycles     |                      |                      |
|----------------------------------------|----------------------|----------------------|----------------------|----------------------|----------------------|----------------------|
|                                        | Commercial           | T1D3                 | T1D3-5.5             | Commercial           | T1D3                 | T1D3-5.5             |
| $R_o (\Omega \cdot \text{cm}^{-2})$    | 2.82                 | 3.64                 | 4.10                 | 16.84                | 5.58                 | 5.79                 |
| CPE1-T                                 | $5.04 \cdot 10^{-6}$ | $5.07 \cdot 10^{-7}$ | $3.31 \cdot 10^{-5}$ | $4.32 \cdot 10^{-6}$ | $7.12 \cdot 10^{-5}$ | $5.99 \cdot 10^{-5}$ |
| CPE1-P                                 | 0.91                 | 0.66                 | 0.73                 | 0.85                 | 0.67                 | 0.65                 |
| $R_1 (\Omega \cdot \text{cm}^{-2})$    | 14.70                | 8.76                 | 5.92                 | 25.46                | 10.58                | 10.15                |
| CPE2-T                                 | $8.18 \cdot 10^{-5}$ | $2.60 \cdot 10^{-4}$ | $3.50 \cdot 10^{-4}$ | $1.43 \cdot 10^{-4}$ | $2.76 \cdot 10^{-3}$ | $9.09 \cdot 10^{-3}$ |
| CPE2-P                                 | 0.77                 | 0.81                 | 0.77                 | 1.03                 | 0.84                 | 0.61                 |
| $R_2 (\Omega \cdot \text{cm}^{-2})$    | 15.47                | 5.20                 | 5.54                 | 3.25                 | 2.65                 | 2.30                 |
| CPE3-T                                 | $4.94 \cdot 10^{-3}$ | $6.14 \cdot 10^{-3}$ | $5.71 \cdot 10^{-3}$ | $4.57 \cdot 10^{-3}$ | $5.67 \cdot 10^{-3}$ | $4.96 \cdot 10^{-3}$ |
| CPE3-P                                 | 0.91                 | 0.71                 | 0.83                 | 0.95                 | 0.96                 | 0.95                 |
| $R_{CT} (\Omega \cdot \text{cm}^{-2})$ | 4.80                 | 9.53                 | 4.56                 | 28.75                | 3.03                 | 8.73                 |
| W1-R                                   | 27.63                | 38.94                | 35.37                | 308.7                | 22.73                | 23.58                |
| W1-T                                   | 99.53                | 56.93                | 70.82                | 69454                | 63.03                | 55.26                |
| W1-P                                   | 0.35                 | 0.48                 | 0.45                 | 0.28                 | 0.50                 | 0.57                 |
